# Supplementary material
Source: PubMed Central journal article supplement (PMC4794032)
Supplement: attf022447.wt1_default.pdf [file attf022447.wt1_default.pdf]

Supplemental table. Hospital acquired conditions defined by the Centers for Medicare and Medicaid Services (CMS) criteria

| <b>Hospital acquired conditions</b>                                                                                                | <b>CMS ICD-9CM criteria*</b>                                                                           |
|------------------------------------------------------------------------------------------------------------------------------------|--------------------------------------------------------------------------------------------------------|
| Surgical site infection (SSI), mediastinitis, after coronary artery bypass graft                                                   | 519.2 with procedure codes 36.10-36.19                                                                 |
| SSI after certain orthopedic procedures (spine, neck, shoulder, elbow)                                                             | 996.67, 998.59 with procedure codes: 81.01-81.08, 81.23-81.24, 81.31-81.38, 81.83, or 81.85            |
| SSI after bariatric surgery for obesity (laparoscopic gastric bypass, gastroenterostomy, laparoscopic gastric restrictive surgery) | 278.01, 539.01, 539.81, 998.59 with procedure codes: 44.38, 44.39, 44.95                               |
| SSI after cardiac implantable electronic device                                                                                    | 996.61, 998.59 with procedure codes: 00.50-00.54, 37.80-37.87, 37.04, 37.96, 37.98, 37.74-37.79, 37.89 |
| Foreign object retained after surgery                                                                                              | 998.4, 998.7                                                                                           |
| Catheter associated urinary tract infection                                                                                        | 996.4                                                                                                  |
| Vascular catheter associated infection                                                                                             | 999.31-999.33                                                                                          |
| Deep vein thrombosis and pulmonary embolism after certain orthopedic procedures (total knee replacement, hip replacement)          | 415.11, 415.13, 415.19, 453.40-453.42 with procedure codes: 00.85-00.87, 81.51-81.52, 81.54            |
| Falls and trauma                                                                                                                   | 800-829, 830-839, 850-854, 925-929, 940-949, 991-994                                                   |
| Manifestations of poor glycemic control                                                                                            | 250.10-250.13, 250.20-250.23, 251.0, 249.10-249.11, 249.20-249.21                                      |
| Air embolism                                                                                                                       | 999.1                                                                                                  |
| Blood incompatibility                                                                                                              | 999.60-999.69                                                                                          |
| Pressure ulcers                                                                                                                    | 707.23-707.24                                                                                          |
| Iatrogenic pneumothorax with venous catheterization                                                                                | 512.1 with procedure code: 38.93                                                                       |

\*Hospital acquired conditions were identified using International Classification of Diseases, ninth edition, Clinical Modification (ICD-9CM) codes and verified with literature from CMS.
