# Supplementary material
Source: PubMed Central journal article supplement (PMC4794032)
Supplement: attf022447.wt2_default.pdf [file attf022447.wt2_default.pdf]

Supplemental Table. Predictors of Hospital Acquired Complications by Multivariate Analysis (Multiple Imputation Analysis).

| Patient Predictors                 |           |            |         |
|------------------------------------|-----------|------------|---------|
| Admission Day                      | OR        | 95% CI     | p-value |
| Weekend admission                  | 1.21      | 1.20, 1.22 | < 0.01  |
| Weekday admission                  | Reference |            |         |
| Race                               | OR        | 95% CI     | p-value |
| White                              | Reference |            |         |
| Black                              | 0.77      | 0.74, 0.79 | < 0.01  |
| Hispanic                           | 0.77      | 0.74, 0.80 | < 0.01  |
| Asian Pacific Islander             | 0.71      | 0.67, 0.75 | < 0.01  |
| Native American                    | 0.87      | 0.77, 0.98 | 0.03    |
| Other                              | 0.88      | 0.82, 0.94 | <0.01   |
| Payer Information                  | OR        | 95% CI     | p-value |
| Medicare                           | 0.86      | 0.83, 0.89 | < 0.01  |
| Medicaid                           | 0.65      | 0.62, 0.68 | < 0.01  |
| Private Insurance                  | Reference |            |         |
| Self-Pay                           | 1.35      | 1.28, 1.43 | < 0.01  |
| No Charge                          | 1.11      | 0.97, 1.27 | 0.14    |
| Other                              | 2.04      | 1.93, 2.16 | < 0.01  |
| Gender                             | OR        | 95% CI     | p-value |
| Female                             | 0.89      | 0.87, 0.92 | < 0.01  |
| Male                               | Reference |            |         |
| Comorbidities                      | OR        | 95% CI     | p-value |
| No comorbidities                   | Reference |            |         |
| One                                | 0.70      | 0.69, 0.72 | < 0.01  |
| Two or more                        | 0.55      | 0.53, 0.58 | <0.01   |
| Age                                | OR        | 95% CI     | p-value |
| < 18 years old                     | 0.49      | 0.47, 0.52 | < 0.01  |
| 19-30 years old                    | 0.43      | 0.41, 0.46 | < 0.01  |
| 31-40 years old                    | 0.38      | 0.37, 0.40 | < 0.01  |
| 41-50 years old                    | 0.42      | 0.40, 0.43 | < 0.01  |
| 51-65 years old                    | 0.41      | 0.40, 0.42 | < 0.01  |
| 66-80 years old                    | 0.57      | 0.56, 0.58 | < 0.01  |
| Over 80 years old                  | Reference |            |         |
| All Patient Refined DRG – Severity | OR        | 95% CI     | p-value |
| Minor loss of function             | Reference |            |         |
| Moderate loss of function          | 1.41      | 1.38, 1.45 | <0.01   |
| Major loss of function             | 1.79      | 1.73, 1.86 | <0.01   |
| Extreme loss of function           | 2.63      | 2.51, 2.75 | <0.01   |
| Hospital Predictors                |           |            |         |
| Hospital Region                    | OR        | 95% CI     | p-value |
| Northeast                          | Reference |            |         |
| Midwest                            | 1.19      | 1.10, 1.28 | <0.01   |

|                          |           |              |         |
|--------------------------|-----------|--------------|---------|
| South                    | 1.23      | 1.14, 1.32   | <0.01   |
| West                     | 1.27      | 1.18, 1.38   | < 0.01  |
| Hospital Location        | OR        | 95% CI       | p-value |
| Rural                    | Reference |              |         |
| Urban                    | 0.96      | 0.92, 1.00   | 0.05    |
| Hospital Teaching Status | OR        | 95% CI       | p-value |
| Non-teaching             | Reference |              |         |
| Teaching                 | 1.32      | 1.25, 1.38   | < 0.01  |
| Hospital Bed Size        | OR        | 95% CI       | p-value |
| Small                    | Reference |              |         |
| Medium                   | 1.08      | 1.02, 1.14   | 0.01    |
| Large                    | 1.13      | 1.07, 1.18   | < 0.01  |
| Admission Type           | OR        | 95% CI       | p-value |
| Emergency                | 1.48      | 1.37, 1.59   | <0.01   |
| Urgent                   | 1.30      | 1.23, 1.37   | <0.01   |
| Elective                 | Reference |              |         |
| Newborn                  | 0.08      | 0.07, 0.1    | <0.01   |
| Delivery                 | 22.95     | 14.85, 35.45 | <0.01   |
| Other                    | 2.18      | 1.39, 3.40   | <0.01   |
| Admission Source         | OR        | 95% CI       | p-value |
| Emergency Department     | 2.62      | 2.44, 2.82   | <0.01   |
| Another Hospital         | 2.17      | 1.99, 2.37   | <0.01   |
| Other Health Facility    | 1.95      | 1.81, 2.12   | <0.01   |
| Court/Law Enforcement    | 1.24      | 0.90, 1.69   | 0.19    |
| Routine                  | Reference |              |         |

Note: In multivariate logistic regression adjusting for patient (race, payer status, comorbidities, age, gender, patient refined DRG severity) and hospital (region, location, teaching status, bed size, admission type and source) factors, the probability of incurring at least one HAC was shown to be approximately 20% higher in weekend admits when compared to weekday admits.
